1 **Title:** Anatomical Substrates and Connectivity for Parkinson's Disease Bradykinesia  
2 Components after STN-DBS  
3

4 **Authors:** Min Jae Kim, BS<sup>1-3</sup>, Yiwen Shi, MD<sup>1</sup>, Jasmine Lee<sup>1</sup>, Yousef Salimpour, PhD<sup>2</sup>,  
5 William S. Anderson, PhD, MD<sup>2,3</sup>, Kelly A. Mills, MD<sup>1,\*</sup>  
6

7 **Affiliations**  
8

- 9 1. Movement Disorders Division, Department of Neurology, Johns Hopkins School of  
10 Medicine, Baltimore, MD, USA  
11 2. Department of Neurosurgery, Johns Hopkins School of Medicine, Baltimore, MD, USA  
12 3. Department of Biomedical Engineering, Johns Hopkins School of Medicine, Baltimore,  
13 MD, USA  
14  
15

16 **\*Corresponding Author:**  
17

18 **Kelly A. Mills, MD**

19 Johns Hopkins University School of Medicine  
20 Dept. of Neurology  
21 Meyer 6-181D  
22 600 N. Wolfe Street  
23 Baltimore, MD 21287  
24 Phone: 410-502-0133, email: [kmills16@jhmi.edu](mailto:kmills16@jhmi.edu)  
25

26 **Word Count:**

27 Abstract: 250  
28 Main Text: 3482  
29

30 **Running Title:** STN-DBS and PD bradykinesia motor components  
31

32 **Key Words:** Parkinson's disease; deep brain stimulation; bradykinesia; subthalamic nucleus  
33

34 **Financial Disclosure / Conflict of Interest:** William S. Anderson sits on Advisory Boards for  
35 Longeviti Neuro Solution and is a paid consultant for Globus Medical.  
36

37 **Funding:** Kelly Mills received research funding from NIH/NINDS (5K23NS101096-01A1),  
38 Michael J. Fox Foundation, Parkinson Foundation, UCB, FDA (U01FD005942), and received  
39 honoraria from the Parkinson Study Group.

1 **ABSTRACT**

2

3 **Background:** Parkinsonian bradykinesia is rated using a composite scale incorporating slowed  
4 frequency of repetitive movements, decrement amplitude, and arrhythmicity. Differential  
5 localization of these movement components within basal ganglia would drive the development of  
6 more personalized network-targeted symptomatic therapies.

7

8 **Methods:** Using an optical motion sensor, amplitude and frequency of hand movements during  
9 grasping task were evaluated with subthalamic nucleus (STN)-Deep Brain Stimulation (DBS) “on”  
10 or “off” in 15 patients with Parkinson’s disease (PD). The severity of bradykinesia was assessed  
11 blindly using the MDS-UPDRS Part-III scale. Volumes of activated tissue (VAT) of each subject  
12 were estimated where changes in amplitude and frequency were mapped to identify distinct  
13 anatomical substrates of each component in the STN. VATs were used to seed a normative  
14 functional connectome to generate connectivity maps associated with amplitude and frequency  
15 changes.

16

17 **Results:** STN-DBS-induced change in amplitude was negatively correlated with change in MDS-  
18 UPDRS-III right ( $r = -0.65$ ,  $p < 0.05$ ) and left hand grasping scores ( $r = -0.63$ ,  $p < 0.05$ ). The  
19 change in frequency was negatively correlated with amplitude for both right ( $r = -0.63$ ,  $p < 0.05$ )  
20 and left hand ( $r = -0.57$ ,  $p < 0.05$ ). The amplitude and frequency changes were represented as a  
21 spatial gradient with overlapping and non-overlapping regions spanning the dorsolateral-  
22 ventromedial axis of the STN. Whole-brain correlation maps between functional connectivity and  
23 motor changes were also inverted between amplitude and frequency changes.

24

25 **Conclusion:** DBS-associated changes in frequency and amplitude were topographically and  
26 distinctly represented both locally in STN and in whole-brain functional connectivity.

27

28

29 **Figures: 4**

30 **Tables: 1**

31 **Supplementary Materials: 2**

## 1 Introduction

2  
3 Deep Brain Stimulation (DBS) is a well-established treatment for refractory motor  
4 complications of Parkinson's Disease (PD), and most often targets the subthalamic nucleus (STN)  
5 or internal pallidum.<sup>1,2</sup> STN DBS is the most common procedure internationally, and is used to  
6 target tremor, rigidity, and bradykinesia.

7  
8 To assess the baseline severity of bradykinesia and its clinical changes after therapeutic  
9 interventions, the MDS-Unified Parkinson's Disease Rating Scale (MDS-UPDRS III) is widely  
10 adopted in clinics since it provides a reliable quantitative feature of bradykinesia severity through  
11 different tasks of both upper and lower extremities.<sup>3</sup> However, bradykinesia ratings represent a  
12 composite score encompassing multiple motor features. For example, a single rating, ranging  
13 from 0 to 4, can be determined in the presence of loss of rhythm or interruptions, slowing, or  
14 amplitude decrements during the task.<sup>3</sup> As such, potentially independent motor features may  
15 differentially influence the assessment of bradykinesia based on the MDS-UPDRS Part III rating.<sup>4,5</sup>  
16

17  
18 Recent neuroimaging studies have highlighted the presence of spatially localized "sweet spots"  
19 in the STN for DBS, stimulation of which may result in superior motor improvement.<sup>6-8</sup> However,  
20 neural substrates within the STN associated with changes in individual bradykinesia motor  
21 features are not well characterized. Understanding the neural substrates representing  
22 independent motor features of bradykinesia would help elucidate the larger role STN plays in  
23 complex human motor function. Furthermore, DBS provides a unique opportunity to study the  
24 systems neuroscience of motor control by deconstructing parallel circuitry through the STN by  
25 stimulating specific sub-regions. This approach would help describe the representation of motor  
26 features of bradykinesia both within the basal ganglia and across larger cortical networks.  
27 Clinically, understanding a refined "sweet spot" for each of these motor features could aid in  
28 tailoring imaging-based DBS programming to specifically target a given patient's symptoms and  
29 signs. It could also potentially help develop more personalized DBS therapy approaches that  
30 target the most prominent components of bradykinesia in an individual patient.

31  
32 In this study, we first investigated changes in two separate motor features – amplitude and  
33 frequency – and their association with the overall MDS-UPDRS III bradykinesia rating after STN-  
34 DBS was applied. Based on these findings, we then explored how these changes in motor  
35 features were represented in both local STN stimulation sites and larger cortical network levels  
36 through functional connectivity analysis.

## 37 Methods

### 38 1. Patient Recruitment

39  
40  
41  
42 Patients diagnosed with clinically established PD<sup>9</sup> who underwent bilateral STN DBS with  
43 stable stimulation parameters for at least 3 months at the Johns Hopkins Neuromodulation  
44 and Advanced Therapies Clinic were recruited for the study (Internal IRB number:  
45 IRB00270213). Patients are evaluated for advanced therapies with a multi-disciplinary  
46 approach that includes medication response testing, neuropsychological evaluation, and as-  
47 needed ancillary assessments by psychiatry or physical therapy.<sup>10</sup> Patients who had dementia,  
48 language impairments, or were known to have significant discomfort when DBS was turned  
49 off were excluded from the study. Patients without sufficient postoperative CT imaging for lead  
50 reconstruction were excluded from the study.  
51

## 2. Motor Feature Selection & Processing

We utilized the Leap Motion Controller (LMC) (Ultraleap, Mountain View, CA USA) optical tracking sensor to capture real-time hand location and assess motor features of bradykinesia. Knowledge of time-variant hand coordinates from the LMC sensor allowed us to quantify hand motion and evaluate different motor features of bradykinesia independently. LMC sensors have been adopted in previous investigations for objective motor quantification in PD.<sup>11-13</sup> Because the change in amplitude and frequency of movement is most pertinent when patients perform MDS-UPDRS III bradykinesia testing, we chose these two metrics as motor features of interest for subsequent analysis. To best represent changes in the movement of each distal fingertip captured by the LMC sensor, we chose to analyze motor metrics recorded only from the hand movement “Grasping” (GR) task administered with MDS-UPDRS-III instructions.

Amplitude and frequency motor metrics were processed and evaluated: The LMC sensor records real-time hand position by tracking individual fingertips and joints (**Figure 1A**). From LMC recordings, we were able to reconstruct time-variant coordinates in 3D space of the (1) distal tips of four fingers (D1, D2, D3, D4) and (2) center of the palm while patients were performing the task. Raw movement waveform was captured by taking the mean euclidian distance between each point of D1, D2, D3, D4 and the center of the palm for each trial. From this waveform, amplitude and frequency were independently evaluated.

Amplitude was derived as the mean amplitude of movement waveform based on **Equation 1a**. Frequency was derived as the reciprocal of the mean duration of time taken between each successive peak of the waveform based on **Equation 1b**, as suggested by Butt et al.<sup>11</sup>

$$GR_{amplitude} = \frac{\sum_{k=1}^4 \sqrt{\sum_{n=1}^3 (D_{k,n} - PC_n)^2}}{4}$$

$D_k$  = Distal Tip Position of  $k$ th finger

C = Palm Center Position

$n$  = x, y, z coordinates of  $D_k$

$k$  = 1, 2, 3, 4 (finger number)

### Equation 1a. Grasping Task Amplitude Metric Quantification

$$GR_{frequency} = \frac{1}{N-1} \sum_{i=1}^{N-1} \frac{1}{(t_{peak}(i+1) - t_{peak}(i))}$$

$N$  = Total number of peaks

$t_{peak}$  = Timepoint at  $i$ -th peak

### Equation 1b. Grasping Task Frequency Metric Quantification

## 3. Study Design

Motor data collection using the LMC sensor was performed in two stimulation states: (1) DBS active using clinically effective, stable settings (DBS-ON) and (2) DBS turned off bilaterally (DBS-OFF) as noted in **Figure 1B**. The order of DBS-ON and DBS-OFF states were randomized such

98 that the rater for motor movements was blinded to the DBS state. While most participants (73.3%)  
99 performed under on-medication, others (26.7%) were off-medication or reported unknown  
100 medication status. Because the entire testing session took only 26 minutes, the medication state  
101 was not observed to change during this time period. Patients continued on their normal medication  
102 regimen, allowing us to get a “real world” experience of motoric features that respond to acute  
103 DBS changes. Participants underwent a 10-minute wash-in or wash-out period in each stimulation  
104 state before testing to remove the residual stimulation effect from the previous DBS state before  
105 undergoing the motor test since this was previously shown to be sufficient to allow for the majority  
106 of motoric change from stimulation.<sup>14</sup>

107  
108 During the DBS-ON and DBS-OFF states, motor testing was conducted to evaluate bradykinesia  
109 by asking patients to perform the GR task of the MDS-UPDRS III. For each state, patients were  
110 asked to initially hold the movement for 3 seconds by looking at the “hold” grey cue on the  
111 computer screen, followed by 10 seconds of “go” green cue, followed by 3 seconds of “rest” grey  
112 cue. The “go” and “rest” cue sequence was repeated three times to collect three trials of motor  
113 data per hand (**Figure 1C**). Patients were asked to perform movements starting with the right  
114 hand, followed by the left hand under each DBS state.

115  
116 The severity of bradykinesia for each trial per hand was assessed using the MDS-UPDRS Part III  
117 scale by a trained, blinded rater, and the scores were averaged over the 3 trials for each  
118 stimulation state for each hand. In parallel, we simultaneously quantified amplitude and frequency  
119 motor features using the LMC sensor. The LMC sensor was placed directly underneath the  
120 palm to the maximize field of view of finger movements (**Figure 1D**). A 3D-printed support  
121 apparatus was also used to allow study participants to rest their hands during the rest period of  
122 the task to maintain the constant height (~30cm) between the hand and the sensor.

123  
124

#### 125 **4. Lead Localization**

126 For each patient who underwent LMC motor testing, a preoperative T1 MR and postoperative CT  
127 sequence were used for DBS electrode localization and volume of tissue activated (VAT)  
128 reconstruction using the Lead-DBS suite.<sup>15</sup> First, the postoperative CT was co-registered to  
129 preoperative T1 and T2 MR sequences using the Advanced Normalization Tools (ANTs) +  
130 Subcortical Refine algorithm. Co-registered images then underwent normalization into a common  
131 MNI ICBM 2009b Nonlinear Atlas space using the ANTs. Bilateral DBS electrodes were  
132 reconstructed in a common atlas space from CT electrode trajectory artifacts using a refined  
133 TRAC/CORE method.<sup>16</sup> After DBS electrode reconstruction, the VAT was generated based on  
134 activated contacts, stimulation parameters, and neighboring tissue conductivity. The spatial  
135 boundary of binary the VAT was defined as regions where the distribution of the electric field was  
136 0.2 V/mm or higher as per previous investigations on neuron modeling.<sup>17-19</sup>

#### 137 138 **5. Mean Effect Image (MEI)**

139  
140 A Mean Effect Image (MEI) was produced to display the spatial distribution of the degree of STN-  
141 DBS-induced motor feature change. For each patient, the DBS-induced percent change values  
142 (%) of amplitude and frequency of hand movements were assigned to voxels comprising the VAT  
143 on the contralateral hemisphere. These “numerical” VATs were then averaged across all patients  
144 in the cohort to produce a MEI based on previously published methods.<sup>20, 21</sup> Regions with positive  
145 values in the MEI would suggest a cohort-level increase in that motor feature (frequency or  
146 amplitude) after DBS is applied, and in those with negative values are associated with a decrease  
147 in that motor feature.

148

## 149 6. Functional Connectivity and Motor Features

150

151 To identify cortical and subcortical regions that are significantly associated with post-DBS  
152 amplitude and frequency changes, we performed a correlation analysis between the functional  
153 connectivity maps produced by seeding a normative functional connectome with the VAT of each  
154 patient and respective percent change values (%) of each motor feature. This approach yielded  
155 an "R-Map", a whole-brain map that represents the degree of correlation between functional  
156 connectivity strength of whole-brain regions with stimulation site and respective changes in motor  
157 features. For example, regions in R-Map with positive values notates region where the strength  
158 of functional connectivity is positively correlated with changes in motor features. This R-Map  
159 approach was adopted to assess how the degree of functional coactivation of neural activity  
160 between the subcortical stimulation site and cortical activity was associated with independent  
161 motor feature changes.

162

## 163 7. Statistical Analysis

164

165 Percent change values (%) of amplitude and frequency were correlated together for each hand  
166 using Spearman's Rho correlation method with statistical significance set at  $p < 0.05$ . Furthermore,  
167 the change in amplitude and frequency were also correlated with the change in MDS-UPDRS III  
168 scores. All graphical and statistical analyses were performed using MATLAB 2021a (MathWorks,  
169 Natick, MA) and Prism 9 statistics package (GraphPad Software, San Diego, CA).

170

171

## 172 Results

### 173 1. Demographics and Clinical Information

174

175 The demographics and clinical information of the study cohort are reported in **Table 1**. The study  
176 cohort consisted of 15 patients with STN-DBS, 13 of whom were males and 2 females. The  
177 majority of the cohort (86.7%) were right-handed. The reconstructed DBS electrodes for all 15  
178 patients in the cohort are visualized in **Supplementary Material 1**.

179

180

181

### 182 2. Association Between LMC Motor Features

183

184 Based on the LMC motor features during the GP task, the amplitude and the frequency were  
185 independently evaluated. The percent changes (%) of amplitude and frequency in the DBS-ON  
186 versus DBS-OFF states were then correlated against each other as shown in **Figure 2**. The  
187 change of frequency was negatively correlated with change in amplitude for both left ( $r = -0.57$ ,  
188  $p = 0.035$ , **Figure 2A**) and right hand ( $r = -0.63$ ,  $p = 0.014$ , **Figure 2B**).

189

190

### 191 3. MDS-UPDRS III and LMC Motor Features

192

193 The strength of correlation was evaluated between changes in MDS-UPDRS III score during the  
194 GP task and each of the changes in LMC motor features - amplitude and frequency - caused by  
195 DBS activation. The correlation results in demonstrate that changes in MDS-UPDRS III features  
196 were only significantly correlated with the amplitude changes for both left ( $r = -0.63$ ,  $p = 0.019$ )  
197 and right ( $r = -0.65$ ,  $p = 0.01$ ), but none with frequency changes (**Supplementary Material 2**).  
198 This suggests that the assessment of DBS-induced changes in the MDS-UPDRS Part III hand  
199 grasp bradykinesia score is most sensitive to objectively measured changes in amplitude.

200  
201  
202  
203  
204  
205  
206  
207  
208  
209  
210  
211  
212  
213  
214  
215  
216  
217  
218  
219  
220  
221  
222  
223  
224  
225  
226  
227  
228  
229  
230  
231  
232  
233  
234  
235  
236  
237  
238  
239  
240  
241  
242  
243  
244  
245  
246  
247  
248  
249  
250

#### 4. Mean Effect Image (MEI) of LMC Motor Features

By mapping the amplitude and frequency percent changes to the VAT for each patient, MEI of amplitude and frequency were produced. Based on both amplitude and frequency MEI, the changes in motor features are topographically represented across the stimulation sites in the STN. The amplitude MEI suggests a gradient of improved DBS-induced movement amplitude moving from anterior-medial regions to posterior-lateral regions (Figure 6). Conversely, stimulation across the same axis was associated with a decrease in frequency. This opposite trend is well reflected based on the spatial inversion of amplitude and frequency MEI in **Figure 3**.

#### 5. R-Map of Amplitude and Frequency Changes

We observed a pronounced positive correlation between amplitude changes and functional connectivity strengths in prefrontal cortical regions (Figure 4). For right-hand GP tasks, larger amplitudes were associated with increased functional connectivity with prefrontal motor regions that included, but not limited to, left ventromedial prefrontal cortex ( $r = 0.579$ ,  $p = 0.026$ ), right middle frontal gyrus ( $r = 0.56$ ,  $p = 0.03$ ), and right medial superior frontal gyrus ( $r = 0.678$ ,  $p = 0.007$ ).

On the other hand, the R-Map for frequency changes was inverted, such that a negative correlation was observed between frequency changes and the strength of functional connectivity between the VAT and the prefrontal cortex. Increased frequency of grasping was associated with lower functional connectivity in the left ventromedial prefrontal cortex ( $r = -0.58$ ,  $p = 0.025$ ), right middle frontal gyrus ( $r = -0.58$ ,  $p = 0.026$ ), and right medial superior frontal gyrus ( $r = -0.57$ ,  $p = 0.029$ ).

### Discussion

In this study, we have investigated the distinctive effect of STN-DBS on components of bradykinesia - amplitude and frequency - in patients with PD. With the activation of clinically effective STN DBS, the changes in amplitude were negatively correlated with those in frequency, or vice versa. Furthermore, the DBS stimulation sites associated with an increase in amplitude were spatially distinct from those with an increase in frequency in the STN. This inversion of neural substrates representing amplitude and frequency changes persisted from the subcortical basal ganglia (BG) level to the global cortical level through whole-brain connectivity analysis. To the best of our knowledge, this study is the first to report the anatomical segregation of the STN motor sub-regions that differentially encode amplitude and frequency changes post-DBS, and how this segregation was maintained across functional connectivity patterns at the cortical level.

We have closely considered the relationship between amplitude and frequency in the grasping task and have demonstrated a significant negative correlation between amplitude and frequency changes observed in both hands ( $r = -0.57$  for left hand,  $r = -0.63$  for right hand) after DBS; as amplitude increases, the mean frequency slows. If velocity is relatively constant, this trade-off would be inherent to increasing amplitude. However, this negative correlation is not solely explained by this trade-off with reduced frequency as amplitude increases since there were stimulation settings that improved frequency at the cost of amplitude. (**Figure 2**). Interestingly, the association between these motor features and the MDS-UPDRS III bradykinesia rating further

251 revealed the changes in bradykinesia were significantly driven by changes in amplitude, rather  
252 than frequency. Specifically, the increase in amplitude was correlated with the improvement of  
253 bradykinesia scores for both hands despite the slowing of hand grasping with larger amplitudes.  
254 While we found no previous studies have explored the direct effect of DBS on bradykinesia  
255 components, one study reported that MDS-UPDRS Part III was also negatively correlated with  
256 amplitude during GP task using a wearable kinematics device in the baseline condition.<sup>22</sup>

257  
258 After the changes in motor features were mapped to volumes of stimulated tissue across all  
259 subjects to create the MEI, the MEI valence (“sweet spot” versus “sour spot”) was inverted  
260 between amplitude and frequency changes: stimulation location with the *maximum increment* of  
261 amplitude corresponded to that with the *maximum* decrement of frequency. The “sweet spot” for  
262 amplitude changes was more posterior-dorsolateral and for frequency, more anterior-medial in  
263 the STN. One could hypothesize that “effective” STN stimulation is increasing amplitude but  
264 decreasing frequency and that the frequency “sweet spot” is just the absence of a robust  
265 amplitude benefit. However, participants with stimulation of this region actually shows improved  
266 frequency over DBS-Off, at the cost of amplitude (smaller, faster movements compared to DBS-  
267 OFF).

268  
269 Based on this spatially graded distribution within STN, we postulate that the negative correlation  
270 between amplitude and frequency changes was driven by the inversive representation within the  
271 shared neural substrate and the network connectivity of these two different STN subspace. R-  
272 maps produced between amplitude and frequency were spatially inverted, with regions with  
273 significant correlations in the middle frontal gyrus, medial superior frontal gyrus, and ventromedial  
274 prefrontal cortex. In a sequential movement such as the GP task, the pre-supplementary motor  
275 area (pre-SMA), part of the medial superior frontal gyrus and medial frontal cortex, has been  
276 suggested to be involved in the initiation of self-generated action sequences.<sup>23-26</sup> During a self-  
277 initiated movement task, the functional connectivity between STN and pre-SMA region has been  
278 reported to be strengthened for both healthy and PD patients by employing the hyperdirect and  
279 indirect basal ganglia pathways.<sup>27</sup> STN-DBS may interfere in the STN-pre-SMA connection to  
280 modulate performances in movement initiation in GP, which may emerge as alterations in the  
281 motor frequency and amplitude from baseline condition. The magnitude and the direction changes  
282 of two motor features (i.e increment or decrement) after STN-DBS may be determined based on  
283 the locations of individual VATs relative to “amplitude hotspots” or “frequency hotspots” spatially  
284 distributed across the dorsolateral-ventromedial axis of the STN. However, the precise STN-pre-  
285 SMA connections associated with amplitude and frequency changes are yet unknown and would  
286 warrant further investigations.

287  
288 The spatial distribution of DBS’s differential effect on amplitude of rapid movements are consistent  
289 with existing literature. That targeting dorsolateral STN for DBS was associated with the greatest  
290 bradykinesia improvement<sup>6, 28</sup> is consistent with our finding, such that posterior dorsolateral STN  
291 resulted in the greatest improvement of amplitude changes and the greatest improvement in  
292 MDS-UPDRS III bradykinesia rating. The dorsolateral region of STN has further been shown to  
293 share strong structural connectivity with sensorimotor motor cortical areas such as the primary  
294 motor cortex and supplementary motor areas (SMA). Conversely, the more medial region of STN  
295 encompassing the “sweet spot” for frequency increment, is spatially proximal to the associative  
296 subregion of STN that shares strong connectivity with the associative areas of prefrontal cortices.  
297<sup>29, 30</sup> The differential responses in amplitude and frequency changes thus may be attributed to the  
298 activation of separate STN-prefrontal networks from DBS. Expanding on the network-level  
299 stimulation effect on motor features, we have performed an R-map analysis correlating the degree  
300 of functional connectivity seeding VATs and changes in motor features.

301



302 Several limitations exist in this study. This is a preliminary study performed across a limited cohort  
303 of 15, and future studies with a larger sample size are strongly encouraged to replicate our  
304 findings. Furthermore, in addition to amplitude or frequency, the MDS-UPDRS-III rating is  
305 composed of other motor features, including hesitations or temporal decrement. We chose to  
306 focus on amplitude and frequency because of their canonical influence on shaping the  
307 bradykinesia rating, and clear pre-processing steps to evaluate them from raw motor data. Future  
308 studies should aim at how performances in self-generated action sequences as GP-task are  
309 reflected and altered across multiple motor features of bradykinesia after STN-DBS. Lastly, we  
310 focused on the isolated effect of STN DBS and aimed to run our 26-minute paradigm during  
311 whatever medication state in which they presented, hoping to look at the subtle changes in  
312 bradykinesia detected with the LMC even in the fully or partially medicated state. It is possible  
313 that medication status changed during our paradigm. Nevertheless, because the paradigm was  
314 relatively short, we are confident that both DBS-ON and DBS-OFF test periods were performed  
315 in the same state of medication effect. Regardless, we randomized the stimulation state (“on” or  
316 “off”) so that if a medication wearing-off or kick-in effect were to occur, it would not systematically  
317 be linked with the stimulation “on” or “off” state.

318

### 319 **Conclusion**

320

321 In this study, we demonstrated a differential effect of STN-DBS on bradykinesia motor features  
322 (amplitude and frequency), an effect that also translates to differential network engagement.  
323 Improvement in hand movement amplitude were negatively correlated movement frequency, and  
324 were associated with stimulation of a different STN subregion than that which was associated  
325 with an improvement in frequency and a decline in amplitude. The degree of motor changes was  
326 represented as a spatial gradient across the ventromedial–dorsolateral axis of the STN.  
327 Functional connectivity analysis between stimulated volumes in STN and cortical areas showed  
328 a differential pattern for improvement in amplitude versus frequency of movements.

329

### 330 **Author Roles**

- 331 1. Research project: A. Conception, B. Organization, C. Execution;  
332 2. Statistical Analysis: A. Design, B. Execution, C. Review and Critique;  
333 3. Manuscript Preparation: A. Writing of the first draft, B. Review and Critique;

334

335 M.J.K.: 1A-C, 2A-B, 3A

336 Y.S.: 2A, 2C, 3B

337 J.L.: 1C

338 Y.S.: 1A, 3B

339 W.S.A.: 1A, 3B

340 K.A.M.: 2C, 3B

341

### 342 **Conflict of Interest / Financial Disclosures**

343

344 Kelly Mills received research funding from NIH/NINDS (5K23NS101096-01A1), Michael J. Fox  
345 Foundation, Parkinson Foundation, UCB, FDA (U01FD005942), and received honoraria from  
346 the Parkinson Study Group. William S. Anderson sits on Advisory Boards for Longeviti Neuro  
347 Solution and is a paid consultant for Globus Medical. All other authors report no conflicts of  
348 interest related to the current research.

349

350

351

352

353 **References:**

- 354 1. Anderson VC, Burchiel KJ, Hogarth P, Favre J, Hammerstad JP. Pallidal vs Subthalamic  
355 Nucleus Deep Brain Stimulation in Parkinson Disease. *Archives of Neurology* 2005;62(4):554-  
356 560.
- 357 2. Odekerken VJJ, van Laar T, Staal MJ, et al. Subthalamic nucleus versus globus pallidus  
358 bilateral deep brain stimulation for advanced Parkinson's disease (NSTAPS study): a  
359 randomised controlled trial. *The Lancet Neurology* 2013;12(1):37-44.
- 360 3. Goetz CG, Tilley BC, Shaftman SR, et al. Movement Disorder Society-sponsored  
361 revision of the Unified Parkinson's Disease Rating Scale (MDS-UPDRS): scale presentation and  
362 clinimetric testing results. *Mov Disord* 2008;23(15):2129-2170.
- 363 4. Heldman DA, Giuffrida JP, Chen R, et al. The modified bradykinesia rating scale for  
364 Parkinson's disease: reliability and comparison with kinematic measures. *Mov Disord*  
365 2011;26(10):1859-1863.
- 366 5. Berardelli A, Rothwell JC, Thompson PD, Hallett M. Pathophysiology of bradykinesia in  
367 Parkinson's disease. *Brain* 2001;124(Pt 11):2131-2146.
- 368 6. Dembek TA, Roediger J, Horn A, et al. Probabilistic sweet spots predict motor outcome  
369 for deep brain stimulation in Parkinson disease. *Annals of Neurology* 2019;86(4):527-538.
- 370 7. Wodarg F, Herzog J, Reese R, et al. Stimulation site within the MRI-defined STN  
371 predicts postoperative motor outcome. *Mov Disord* 2012;27(7):874-879.
- 372 8. Bot M, Schuurman PR, Odekerken VJJ, et al. Deep brain stimulation for Parkinson's  
373 disease: defining the optimal location within the subthalamic nucleus. *J Neurol Neurosurg*  
374 *Psychiatry* 2018;89(5):493-498.
- 375 9. Postuma RB, Berg D, Stern M, et al. MDS clinical diagnostic criteria for Parkinson's  
376 disease. *Mov Disord* 2015;30(12):1591-1601.
- 377 10. Langston JW, Widner H, Goetz CG, et al. Core assessment program for intracerebral  
378 transplantations (CAPIT). *Mov Disord* 1992;7(1):2-13.
- 379 11. Butt AH, Rovini E, Dolciotti C, et al. Objective and automatic classification of Parkinson  
380 disease with Leap Motion controller. *BioMedical Engineering OnLine* 2018;17(1):168.
- 381 12. Kim MJ, Naydanova E, Hwang BY, Mills KA, Anderson WS, Salimpour Y. Quantification  
382 of Parkinson's Disease Motor Symptoms: A Wireless Motion Sensing Approach. *Annu Int Conf*  
383 *IEEE Eng Med Biol Soc* 2020;2020:3658-3661.
- 384 13. Naydanova E, Kim MJ, Hwang BY, Mills KA, Anderson WS, Salimpour Y. Objective  
385 Evaluation of Motor Symptoms in Parkinson's Disease via a Dual System of LEAP Motion  
386 Controllers. 2020 IEEE 20th International Conference on Bioinformatics and Bioengineering  
387 (BIBE); 2020 26-28 Oct. 2020. p. 826-829.
- 388 14. Perera T, Yohanandan SAC, Vogel AP, et al. Deep brain stimulation wash-in and wash-  
389 out times for tremor and speech. *Brain Stimulation* 2015;8(2):359.
- 390 15. Horn A, Li N, Dembek TA, et al. Lead-DBS v2: Towards a comprehensive pipeline for  
391 deep brain stimulation imaging. *Neuroimage* 2019;184:293-316.
- 392 16. Horn A, Kühn AA. Lead-DBS: a toolbox for deep brain stimulation electrode localizations  
393 and visualizations. *Neuroimage* 2015;107:127-135.
- 394 17. Åström M, Tripoliti E, Hariz MI, et al. Patient-specific model-based investigation of  
395 speech intelligibility and movement during deep brain stimulation. *Stereotact Funct Neurosurg*  
396 2010;88(4):224-233.
- 397 18. Åström M, Diczfalusy E, Martens H, Wardell K. Relationship between neural activation  
398 and electric field distribution during deep brain stimulation. *IEEE Trans Biomed Eng*  
399 2015;62(2):664-672.
- 400 19. Kuncel AM, Cooper SE, Grill WM. A method to estimate the spatial extent of activation in  
401 thalamic deep brain stimulation. *Clin Neurophysiol* 2008;119(9):2148-2158.
- 402 20. Dembek TA, Barbe MT, Åström M, et al. Probabilistic mapping of deep brain stimulation  
403 effects in essential tremor. *Neuroimage Clin* 2017;13:164-173.

- 404 21. Eisenstein SA, Koller JM, Black KD, et al. Functional anatomy of subthalamic nucleus  
405 stimulation in Parkinson disease. *Ann Neurol* 2014;76(2):279-295.
- 406 22. Vignoud G, Desjardins C, Salardaine Q, et al. Video-based automated analysis of MDS-  
407 UPDRS III parameters in Parkinson disease. *bioRxiv* 2022:2022.2005.2023.493047.
- 408 23. Kennerley SW, Sakai K, Rushworth MF. Organization of action sequences and the role  
409 of the pre-SMA. *J Neurophysiol* 2004;91(2):978-993.
- 410 24. Schwartze M, Rothermich K, Kotz SA. Functional dissociation of pre-SMA and SMA-  
411 proper in temporal processing. *NeuroImage* 2012;60(1):290-298.
- 412 25. Passingham RE, Bengtsson SL, Lau HC. Medial frontal cortex: from self-generated  
413 action to reflection on one's own performance. *Trends in Cognitive Sciences* 2010;14(1):16-21.
- 414 26. Thaler D, Chen YC, Nixon PD, Stern CE, Passingham RE. The functions of the medial  
415 premotor cortex. I. Simple learned movements. *Exp Brain Res* 1995;102(3):445-460.
- 416 27. Jia Q, Gao L, Zhang J, Wu T, Chan P. Altered functional connectivity of the subthalamic  
417 nucleus during self-initiated movement in Parkinson's disease. *Journal of Neuroradiology*  
418 2018;45(4):249-255.
- 419 28. Boutet A, Germann J, Gwon D, et al. Sign-specific stimulation 'hot' and 'cold' spots in  
420 Parkinson's disease validated with machine learning. *Brain Communications* 2021;3(2):fcab027.
- 421 29. Accolla EA, Dukart J, Helms G, et al. Brain tissue properties differentiate between motor  
422 and limbic basal ganglia circuits. *Hum Brain Mapp* 2014;35(10):5083-5092.
- 423 30. Ewert S, Plettig P, Li N, et al. Toward defining deep brain stimulation targets in MNI  
424 space: A subcortical atlas based on multimodal MRI, histology and structural connectivity.  
425 *NeuroImage* 2018;170:271-282.
- 426

| <b>Demographics</b>             | <b><i>N</i> ± SEM (%)</b> |
|---------------------------------|---------------------------|
| <b>Sex</b>                      |                           |
| Male                            | 13 (86.7%)                |
|                                 |                           |
|                                 | 70.4 ± 1.6                |
| <b>Age (yr)</b>                 |                           |
|                                 |                           |
| <b>Age at PD Diagnosis (yr)</b> | 57.2 ± 2.1                |
|                                 |                           |
| <b>Duration of PD (yr)</b>      | 13.2 ± 1.2                |
|                                 |                           |
| <b>Handedness</b>               |                           |
| Right                           | 13 (86.7%)                |
| Left                            | 2 (13.3%)                 |
| <b>Medication Status*</b>       |                           |
| ON                              | 11 (73.3%)                |
| OFF                             | 3 (20%)                   |
| <b>Most Affected Side*</b>      |                           |
| Left                            | 7 (46.7%)                 |
| Right                           | 8 (53.3%)                 |

**Table 1. Demographics and Clinical Information.**

\* Medication status of one patient was unknown.

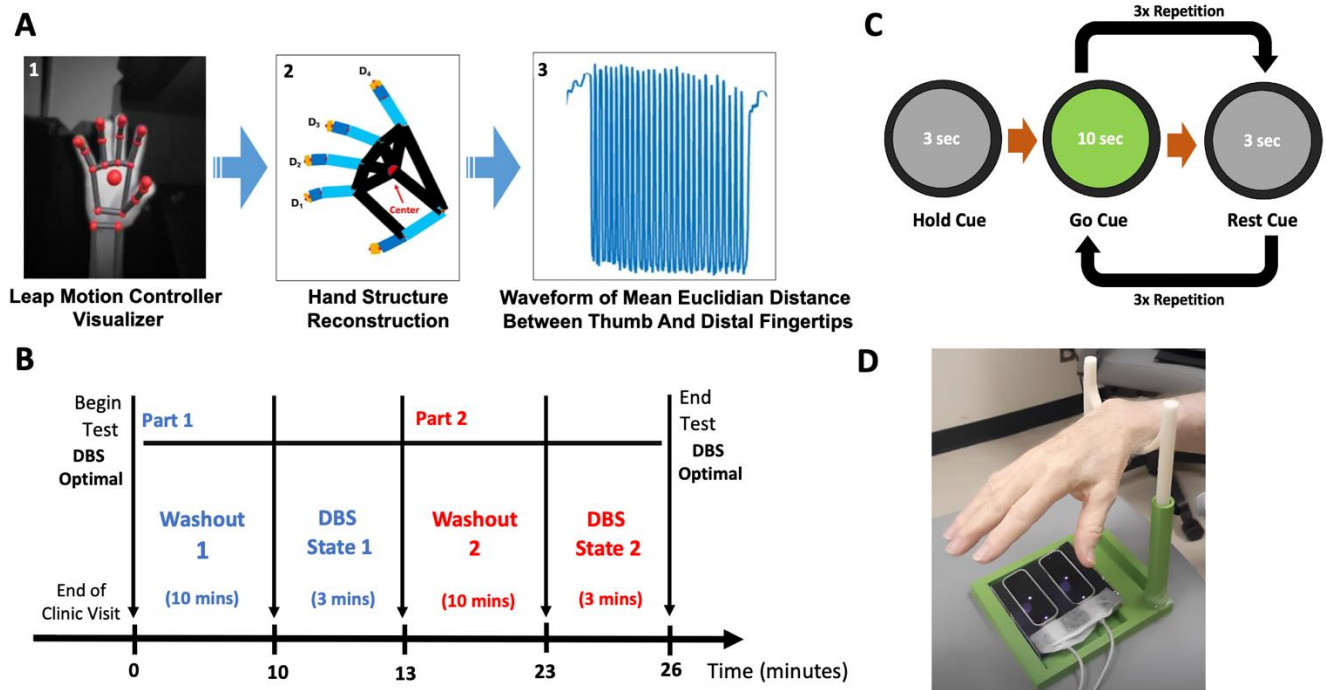

**Figure 1. Study Design for Motor Data Collection. (A)** Bradykinesia Motor Features Processing Flowchart: (1) Hand visualization from Leap Motion Controller (LMC) software user interface. (2) Hand coordinate extraction (D1 – D4) after LMC recording. (3) Time-variant waveform of hand movement during tasks. **(B-C)** The order of the DBS-ON and DBS-OFF was randomized and blinded to the rater, experimenter, and participant. Before each state, the study participant underwent a 10-minute washout period to remove residual DBS stimulation effects from the preceding state. **(D)** Study apparatus with optical motion sensor.

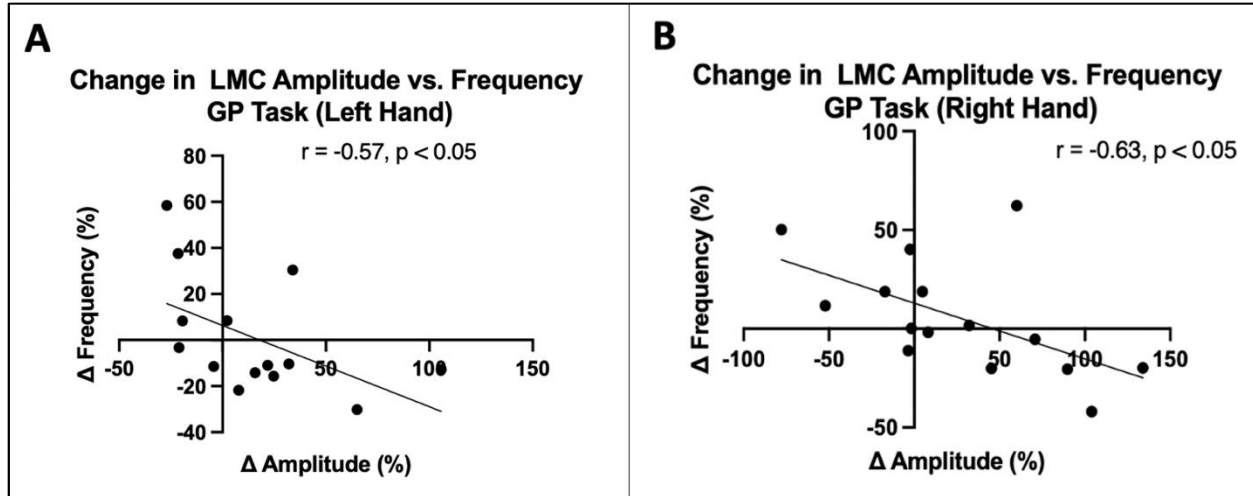

**Figure 2: Association between LMC Amplitude and Frequency. (A) Left Hand. (B) Right hand.** Correlation analysis was performed using Spearman's Rank correlation. Both hands exhibited a negative correlation between the changes in amplitude and frequency after DBS was applied.

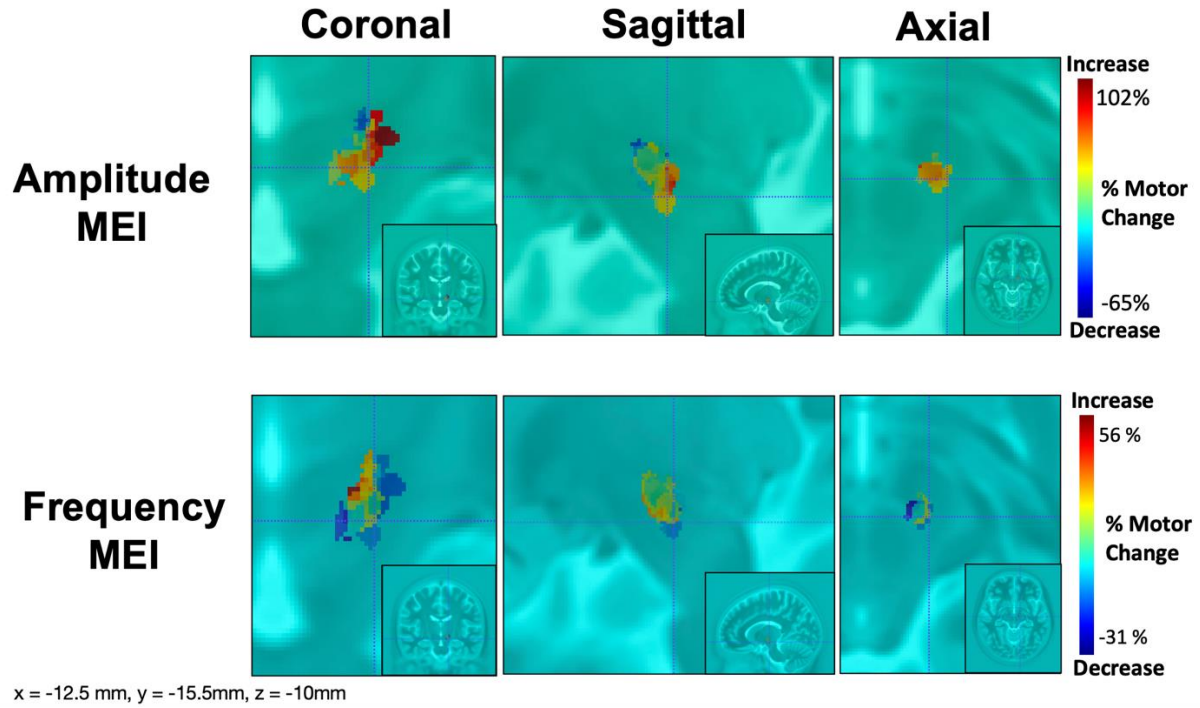

**Figure 3. Mean Effect Image of LMC Motor Features.** Amplitude and frequency MEI are visualized in the top and bottom row, respectively. The relative warmth or coolness of coloration represents correlation with an increase or decrease, respectively, in motor features relative to the mean effect.

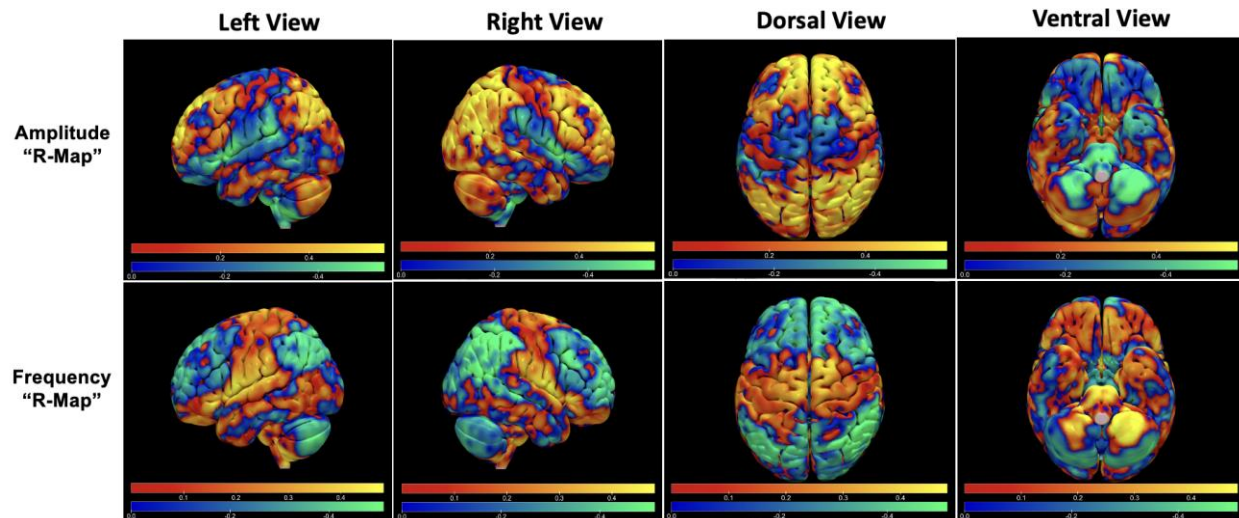

**Figure 4. R-Maps of Amplitude and Frequency Changes Post-DBS.** Red-Yellow regions represent areas with a positive correlation with changes in functional connectivity with the STN DBS VAT and LMC motor feature changes. Blue-Green regions represent areas with a negative correlation.



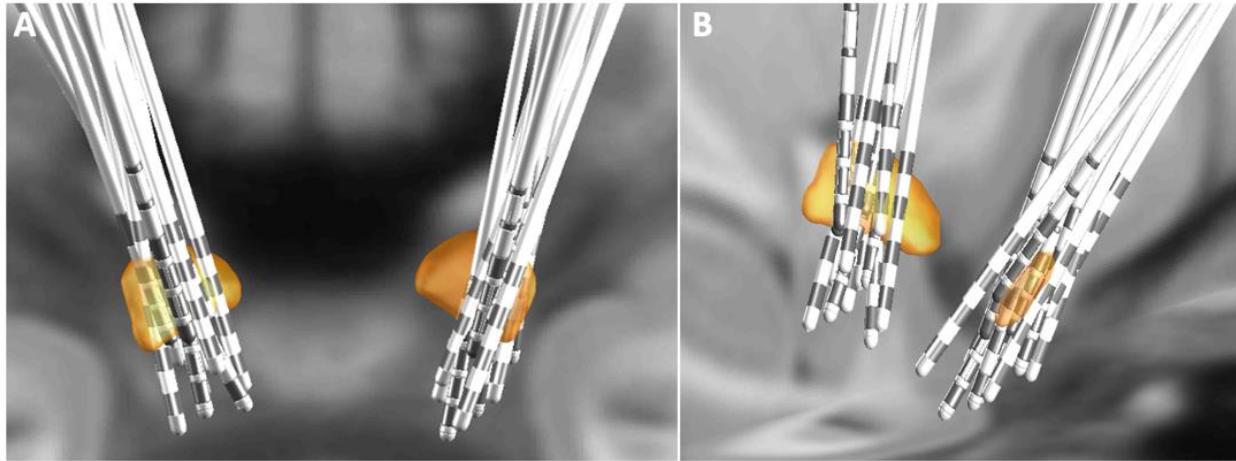

**Supplementary Material 1: Grouped STN-DBS Lead Localization.** DBS leads of 15 patients are reconstructed and shown with bilateral STN (orange) in **(A)** dorsal and **(B)** parasagittal view.

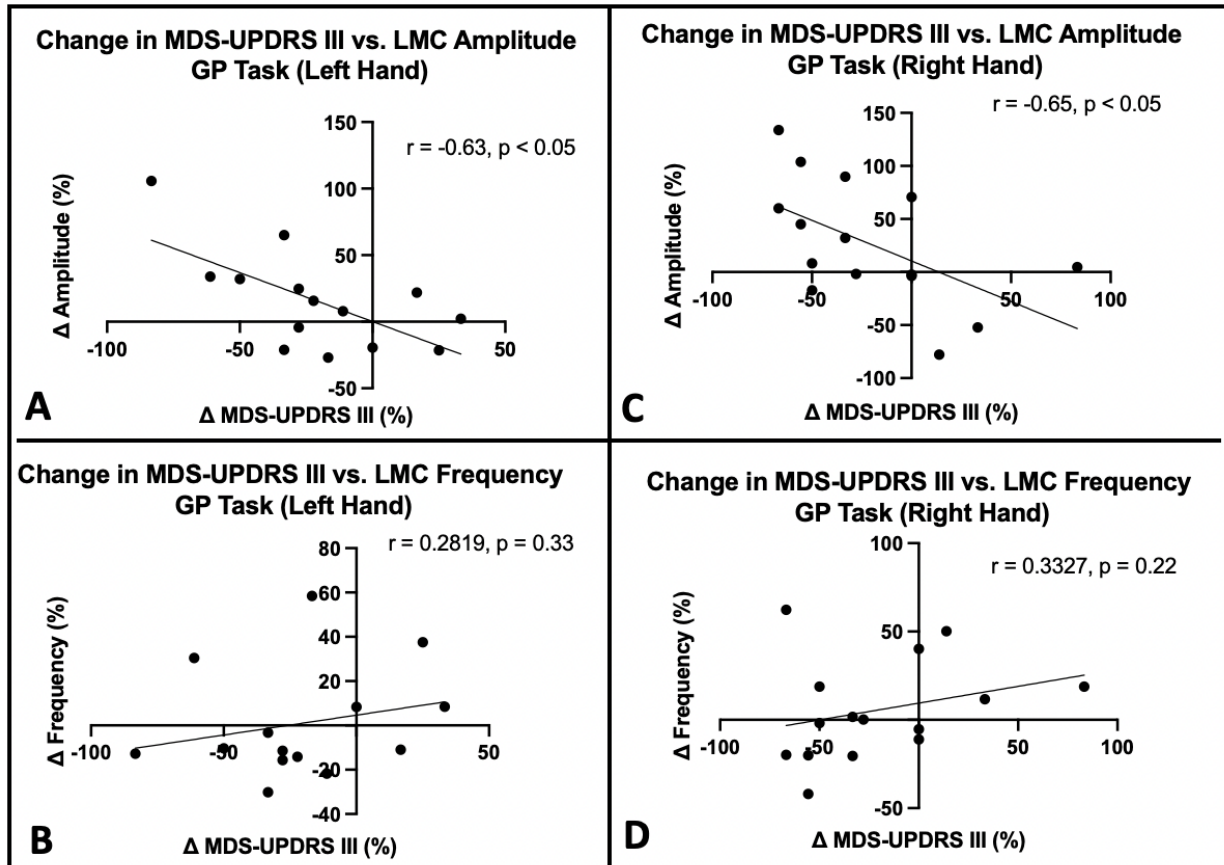

**Supplementary Material 2: Association between LMC Motor Feature Changes and MDS-UPDRS III Rating Changes.** Correlation of changes in MDS-UPDRS III with change in amplitude (top row) or frequency (bottom row) in left hand (left column) or right hand (right column). Correlation coefficients shown for statistically significant correlations.
